# Supplementary material for: Interrogating cardiac muscle cell mechanobiology on stiffness gradient hydrogels
Source: Royal Society of Chemistry journal article supplement (doi:10.1039/d1bm01061a), 2021-01-01
Supplement: d1bm01061a2.pdf [file d1bm01061a2.pdf]

**Figure S1**

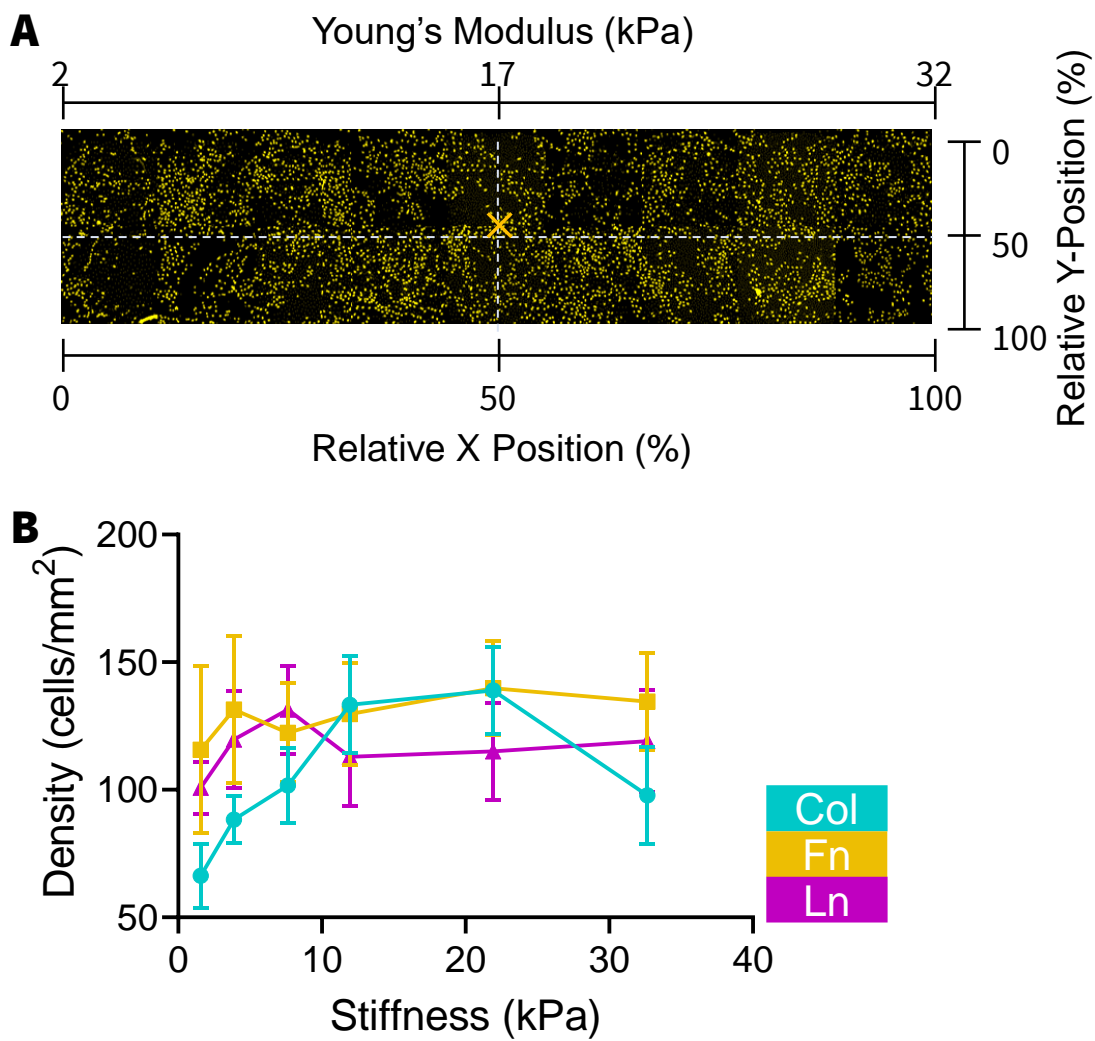

**Figure S1.** Distribution of H9C2 Cells. H9C2 cells were evenly distributed across the substrate surface. **A)** The representative distribution of H9C2 cells across the substrate was constructed from 27 adjacent images taken across a 9x4mm<sup>2</sup> section of the hydrogel. The average position of cells on the X and Y axis is indicated by the yellow cross. **B)** Based on the DAPI stain, the cell density at each stiffness was calculated. Across all stiffnesses and ECM, no significant differences in cell density were detected (Two-way ANOVA,  $P>0.05$ ,  $n=7$ ), however on collagen coated hydrogels, cells tended to be more densely packed between 12 and 22kPa.
